# Supplementary material for: Development of a UiO-66 Based Waterborne Flame-Retardant Coating for PC/ABS Material
Source: MDPI journal article supplement (doi:10.3390/polym16020275), 2024-01-19
Supplement: s1 [file s1]

## Supplementary materials

Table S1. TGA data of samples for WAUPM, WAUM, WAU and WA

|       | T <sub>-5%</sub> | T <sub>MAX1</sub> | Max1 lose rate | T <sub>MAX2</sub> | Max2 lose rate | Residues at 800°C |
|-------|------------------|-------------------|----------------|-------------------|----------------|-------------------|
|       | (°C)             | (°C)              | (%/°C)         | (°C)              | (%/°C)         | (%)               |
| WA    | 367.4            | 433.1             | 3.41           | -                 | -              | 1.5               |
| WAU   | 241.3            | 427.1             | 1.07           | 548.6             | 0.29           | 29.9              |
| WAUM  | 234.6            | 430.5             | 1.30           | 552.7             | 0.27           | 30.9              |
| WAUPM | 195.9            | 293.8             | 0.15           | 415.1             | 1.04           | 38.8              |

Table S2. Results of flame retardant coated PC/ABS for LOI and vertical burning test

| Sample    | LOI/% | UL-94 | t <sub>1</sub> /s | t <sub>2</sub> /s | Dripping |
|-----------|-------|-------|-------------------|-------------------|----------|
| Untreated | 21.2  | NR    | >60               | >60               | YES      |
| WAU-3     | 23.4  | NR    | >60               | >60               | YES      |
| WAUM-3    | 26.1  | V-1   | 17.4              | 21.3              | NO       |
| WAUPM-1   | 22.9  | NR    | >60               | >60               | YES      |
| WAUPM-2   | 24.8  | V-2   | 19.6              | 25.7              | YES      |
| WAUPM-3   | 27.5  | V-0   | 1.7               | 10.8              | NO       |

Table S3. Results of flame retardant coated PC/ABS for Cone Calorimetry Test

| Parameters                           | Untreated | WAUM-3 | WAUPM-1 | WAUPM-2 | WAUPM-3 |
|--------------------------------------|-----------|--------|---------|---------|---------|
| PHRR(kW/m <sup>2</sup> )             | 221.9     | 153.7  | 132.1   | 127.2   | 94.4    |
| t-PHPR(s)                            | 127       | 143    | 272     | 296     | 249     |
| TRR(kW/m <sup>2</sup> )              | 25870     | 18913  | 26383   | 24693   | 17167   |
| TSR(m <sup>2</sup> /m <sup>2</sup> ) | 13.58     | 11.44  | 13.06   | 13.58   | 12.03   |
| FGI                                  | 1.75      | 1.07   | 0.49    | 0.43    | 0.38    |

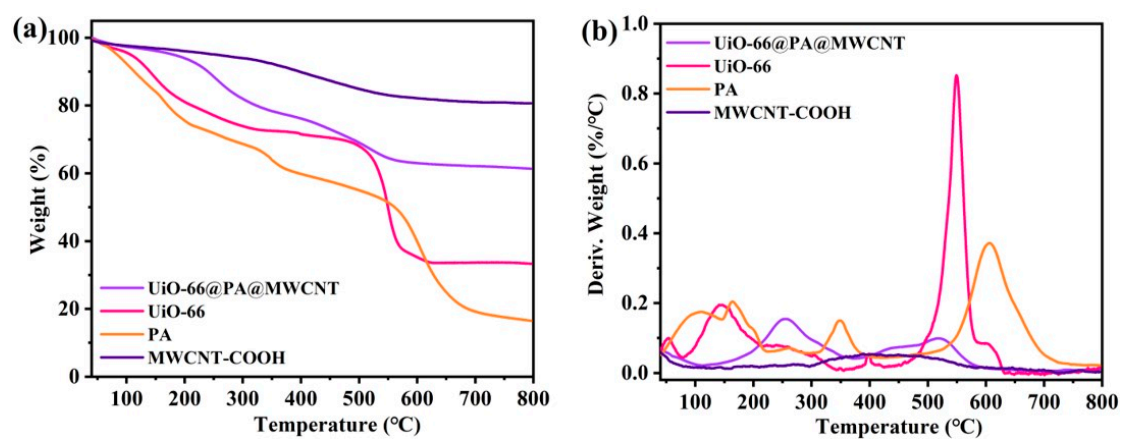

Fig S1. TGA(a) and DTG(b) curves of UiO-66@PA@MWCNT, UiO-66 and MWCNT-COOH

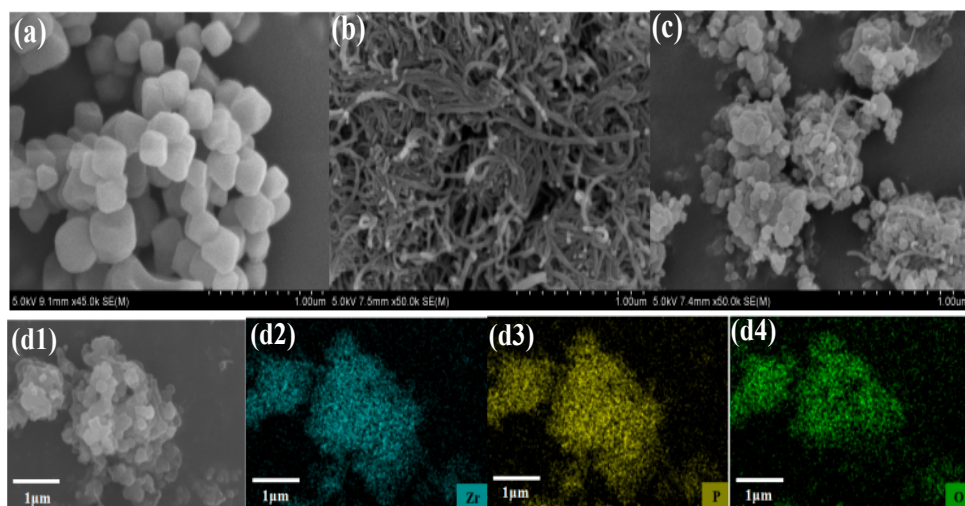

Fig.S2.SEM images of (a) UiO-66; (b) MWCNT-COOH; (c) UiO-66@PA@MWCNT, and elemental distribution (d1-d4) of UiO-66@PA@MWCNT
